# Supplementary material for: Dynamic Proteomic Changes in Tumor and Immune Organs Reveal Systemic Immune Response to Tumor Development
Source: PubMed Central journal article supplement (PMC11060955; doi:10.1016/j.mcpro.2024.100756), 2024-03-28

A

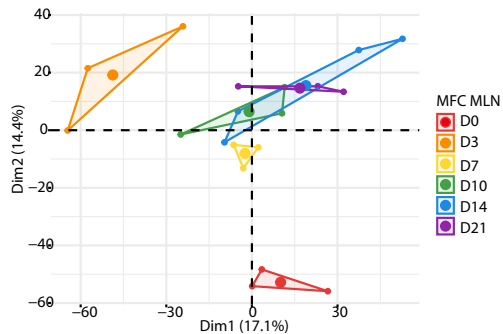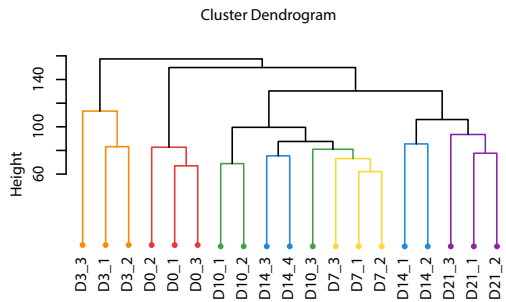

B

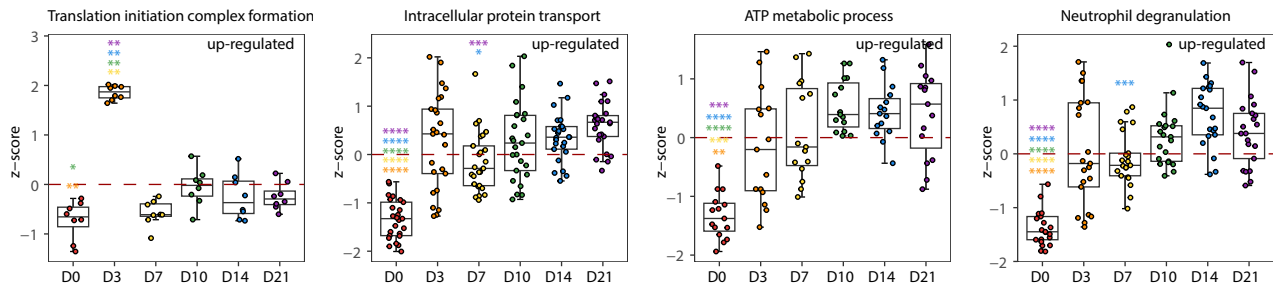

C

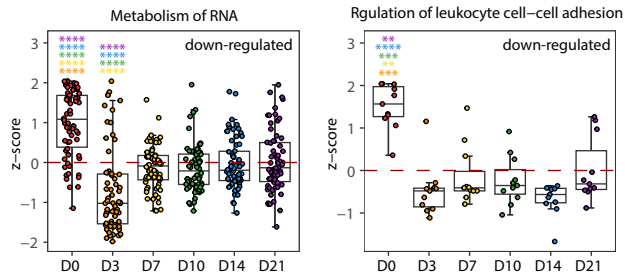

Supplement: mmc2.pdf [file mmc2.pdf]
