# Supplementary material for: Dynamic Proteomic Changes in Tumor and Immune Organs Reveal Systemic Immune Response to Tumor Development
Source: PubMed Central journal article supplement (PMC11060955; doi:10.1016/j.mcpro.2024.100756), 2024-03-28

MFC Cell

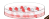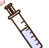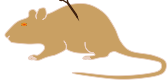

615 mouse

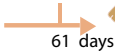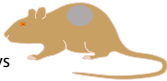

615 mouse

MFC tumor  
mass

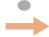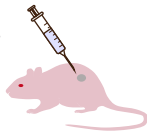

Balb/c-nude  
mouse

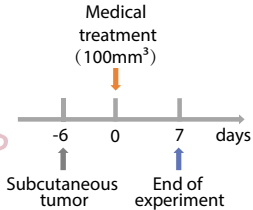

Supplement: mmc3.pdf [file mmc3.pdf]
